# Supplementary material
Source: PubMed Central journal article supplement (PMC2604945)
Supplement: 0809763105_0809763105SI.pdf [file 0809763105_0809763105SI.pdf]

# Supporting Information

Zhang *et al.* 10.1073/pnas.0809763105

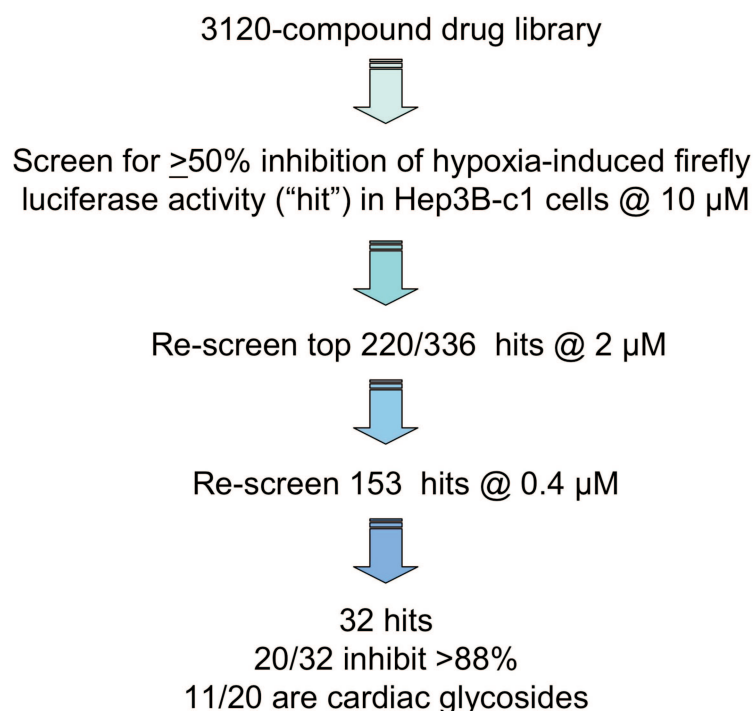

**Digoxin**  
**Ouabain**  
**Proscillaridin A**  
Digitoxin  
Acetyldigoxin  
Convallatoxin  
Peruvoside  
Strophanthin K  
Nerifolin  
Cymarin  
Periplocymarin

**Fig. S1.** Screen for drugs that inhibit HIF-1 transcriptional activity. Hep3B cells were stably cotransfected with: p2.1, a plasmid containing firefly luciferase coding sequences downstream of a 67-bp hypoxia response element and the SV40 early region promoter; and pSV-Renilla, a plasmid containing *Renilla* luciferase coding sequences downstream of the SV40 early region promoter. The ratio of firefly/*Renilla* luciferase activity in cells exposed to nonhypoxic (20%  $\text{O}_2$ ) or hypoxic (1%  $\text{O}_2$ ) culture conditions was determined. A drug library was screened for compounds that reduced the firefly/*Renilla* luciferase activity in hypoxic cells, resulting in the identification of 11 members of the drug class known as cardiac glycosides (*Box*) that specifically inhibited HIF-1-dependent transcriptional activity by  $>88\%$  at a concentration of 0.4  $\mu\text{M}$ . Three members of this class (digoxin, ouabain, and proscillaridin A) were chosen for further study.

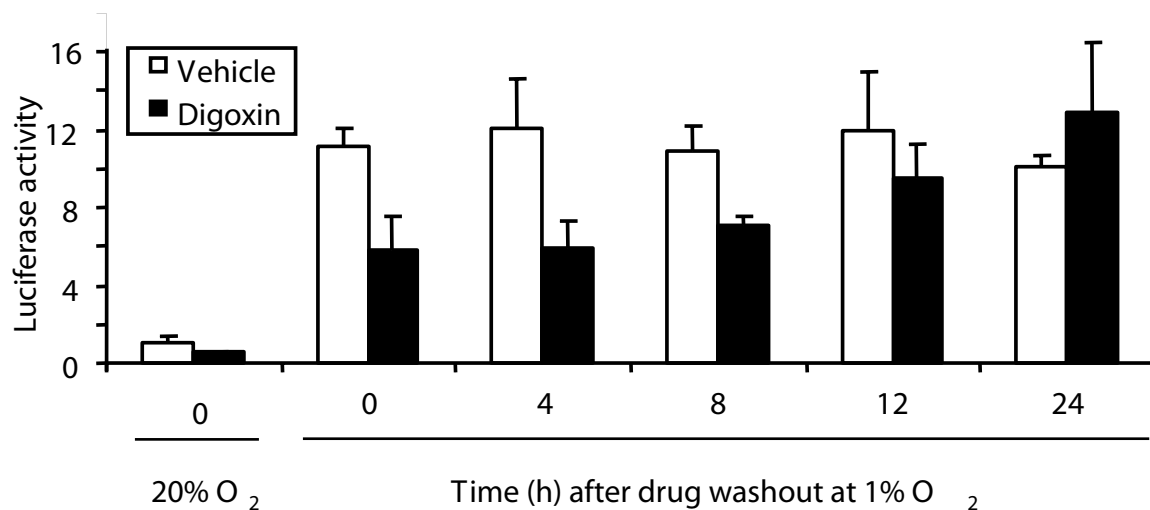

**Fig. S2.** Restoration of HIF-1 activity after drug washout. Hep3B-c1 cells were incubated at 20% or 1% O<sub>2</sub> for 24 h in the presence of vehicle or digoxin, followed by replacement of media without vehicle or digoxin, respectively, and incubation at the same O<sub>2</sub> concentration for an additional 0–24 h, after which the *Renilla*/firefly luciferase activity ratio was determined. The results were normalized to those from vehicle-treated cells incubated at 20% O<sub>2</sub>. (Bars show mean and SD; *n* = 3.)

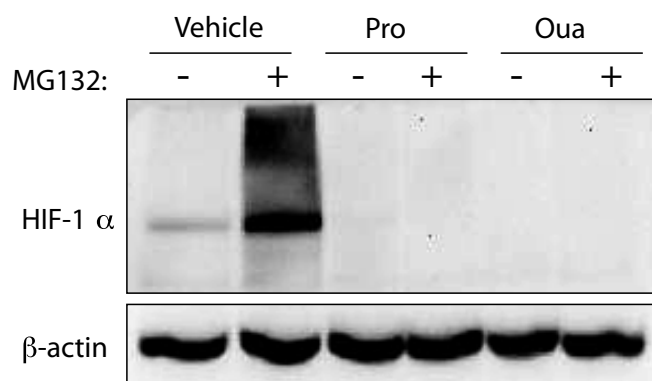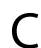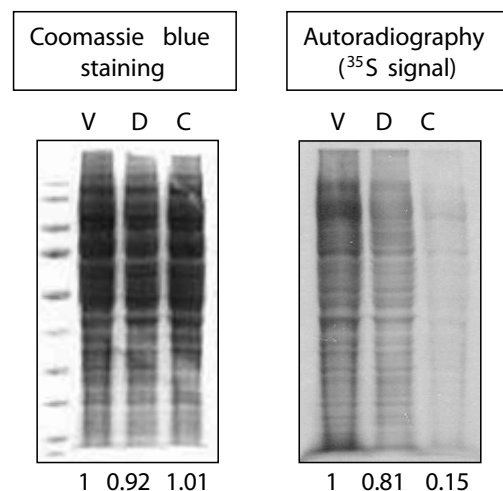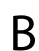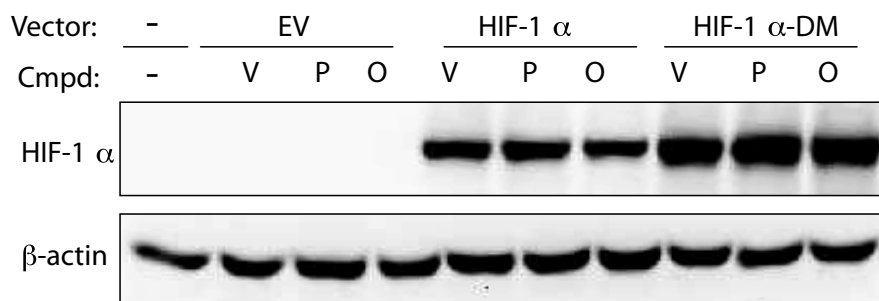

**Fig. S3.** Cardiac glycosides inhibit HIF-1 $\alpha$  protein synthesis. (A) Hep3B cells were treated with vehicle, proscillaridin A (Pro), or ouabain (Oua) in the absence (–) or presence (+) of 5  $\mu$ M MG132 and cell lysates were subjected to immunoblot assays by using anti-HIF-1 $\alpha$  and anti- $\beta$ -actin antibodies. (B) 293T cells were transfected with empty vector (EV) or expression vector encoding FLAG epitope-tagged HIF-1 $\alpha$  that was wild type or double mutant (DM) because of Pro-to-Ala substitutions at residues 402 and 564 of the protein. The cells were cultured in the presence of vehicle (V), proscillaridin A (P), or ouabain (O) for 24 h, and cell lysates were subjected to immunoblot assays by using anti-FLAG antibody. (C) Hep3B cells were pretreated for 4 h with vehicle (V), 100 nM digoxin (D), or 20  $\mu$ g/ml cycloheximide (C) and [ $^{35}$ S]methionine/cysteine was added for 1 h. Aliquots of cell lysate were analyzed for total protein by Coomassie blue staining (Left) and for de novo protein synthesis by  $^{35}$ S-autoradiography (Right). Signal intensity was determined by densitometry.

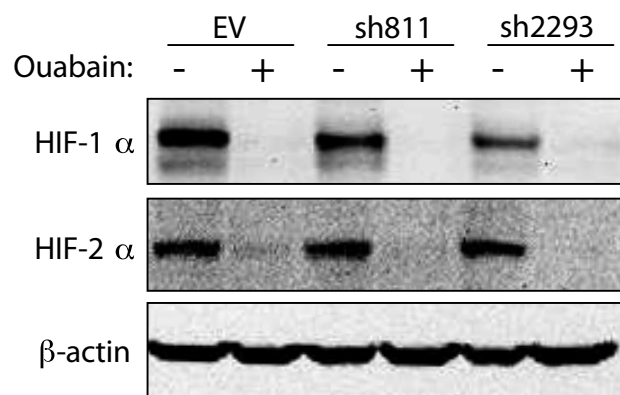

**Fig. S4.**  $\text{Na}^+/\text{K}^+$  ATPase  $\alpha 1$  subunit knockdown in ouabain-treated cells. 293T cells were transiently transfected with empty vector (EV) or expression vectors encoding two different short hairpin RNAs against the  $\text{Na}^+/\text{K}^+$  ATPase  $\alpha 1$  subunit (sh811, sh2293) and treated with vehicle (–) or 100 nM ouabain at 1%  $\text{O}_2$  for 24 h. Whole cell lysates were subjected to immunoblot assays for HIF-1 $\alpha$ , HIF-2 $\alpha$ , and  $\beta$ -actin.

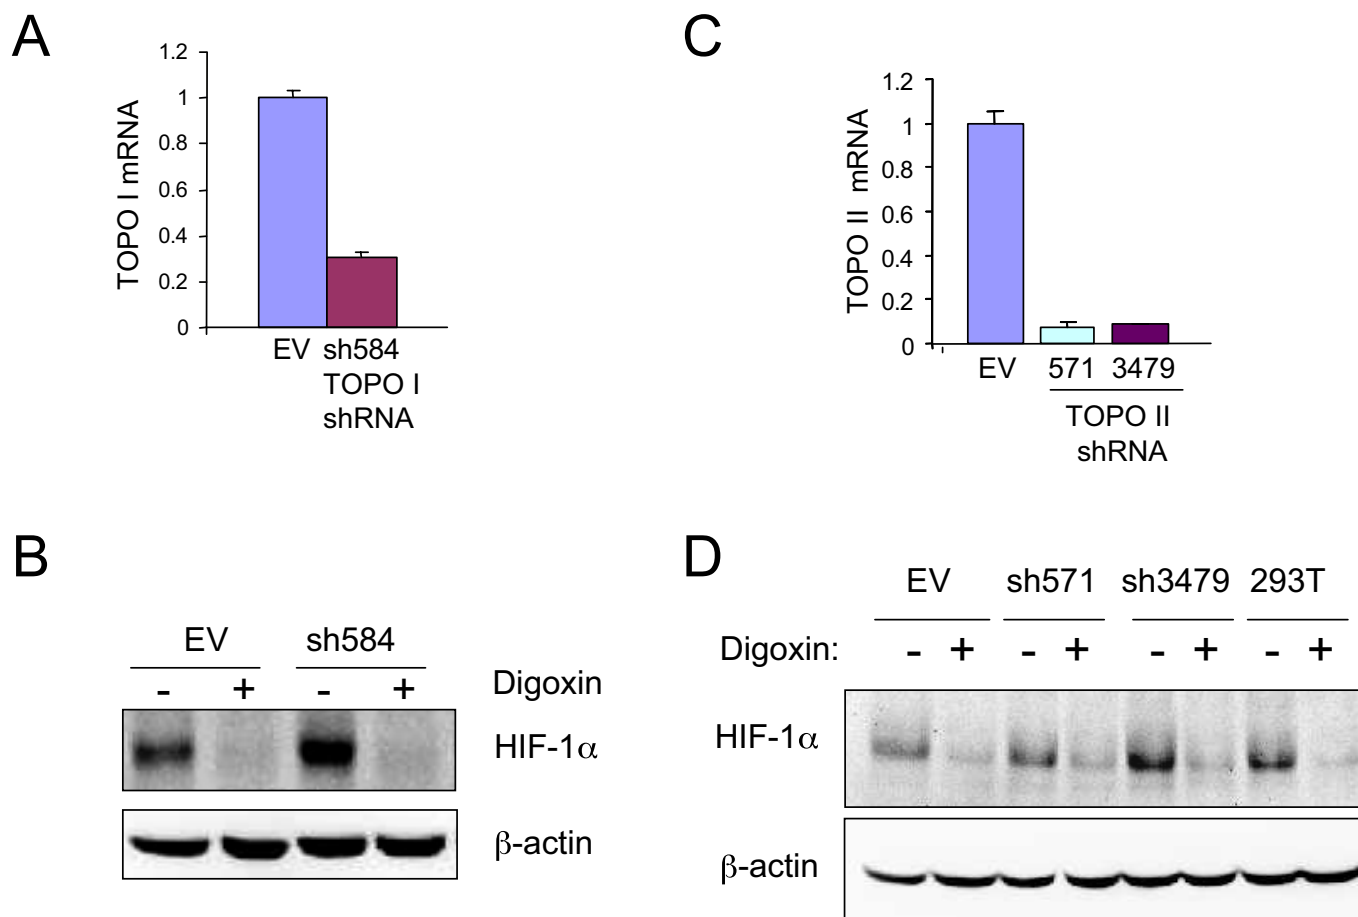

**Fig. S5.** Knockdown of topoisomerase I or II does not affect HIF-1 $\alpha$  levels in the presence or absence of digoxin. 293T cells were transfected with empty vector (EV) or expression vector encoding short hairpin RNA against topoisomerase I (sh584; TOPO I shRNA) or topoisomerase II (sh571 and sh3479; TOPO II shRNA). The expression of TOPO I (A) and TOPO II (C) mRNA was determined by quantitative real-time RT-PCR 72 h after transfection and normalized to the result from cells transfected with EV. The experiment was repeated and nontransfected 293T cells and transfected cells were treated with vehicle (–) or 100 nM digoxin (+) for the last 24 h at 1% O<sub>2</sub>. The effect of TOPO I (B) or TOPO II (D) knockdown on HIF-1 $\alpha$  and  $\beta$ -actin protein expression was determined by immunoblot assay.

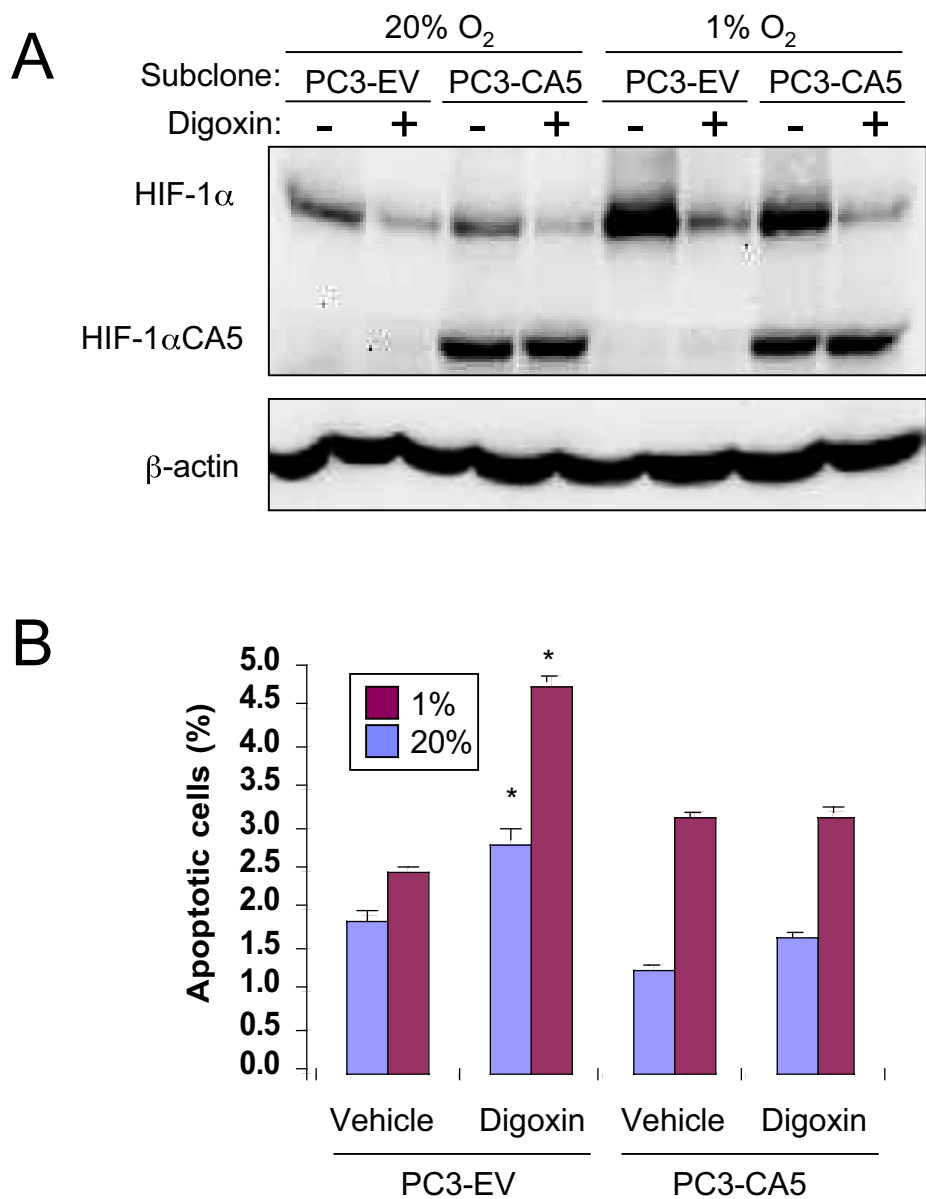

**Fig. 56.** Effect of digoxin on PC3 cell growth. (A) PC3 subclones were cultured for 24 h in the presence of vehicle (–) or digoxin (+) and immunoblot assays were performed. (B) PC3 subclones were cultured for 72 h in the presence of vehicle or digoxin, and the percentage of apoptotic cells was determined based on detection of annexin V. (\*,  $P < 0.05$  vs. vehicle.)

A

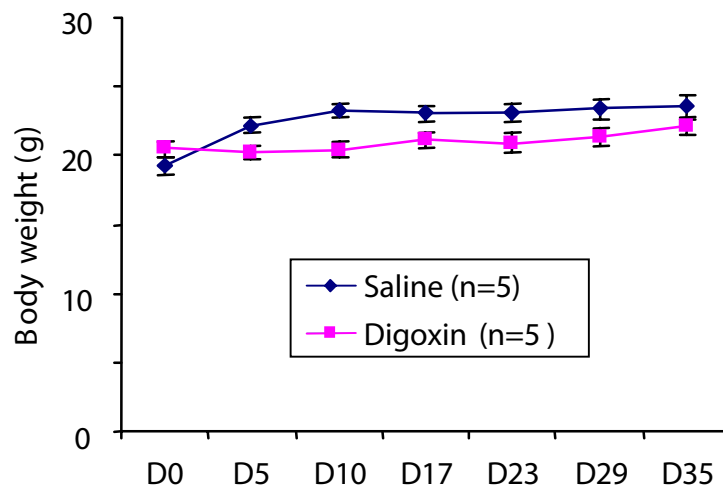

B

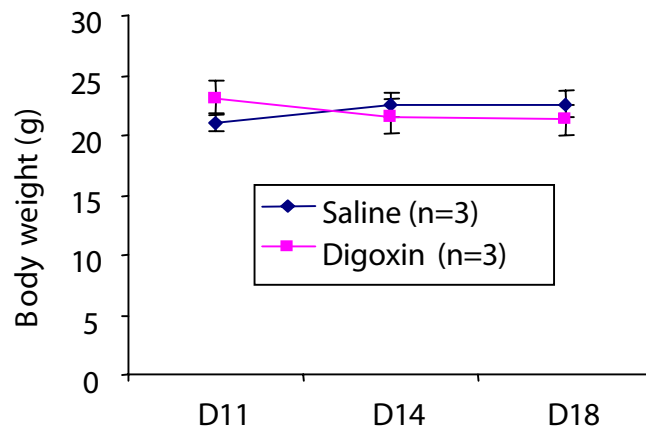

**Fig. S7.** Analysis of body weight in tumor-bearing mice. The body weight (mean  $\pm$  SEM) of the mice bearing tumor xenografts, (A) analyzed in main text Fig. 7A and (B) analyzed in main text Fig. 7D, are shown.

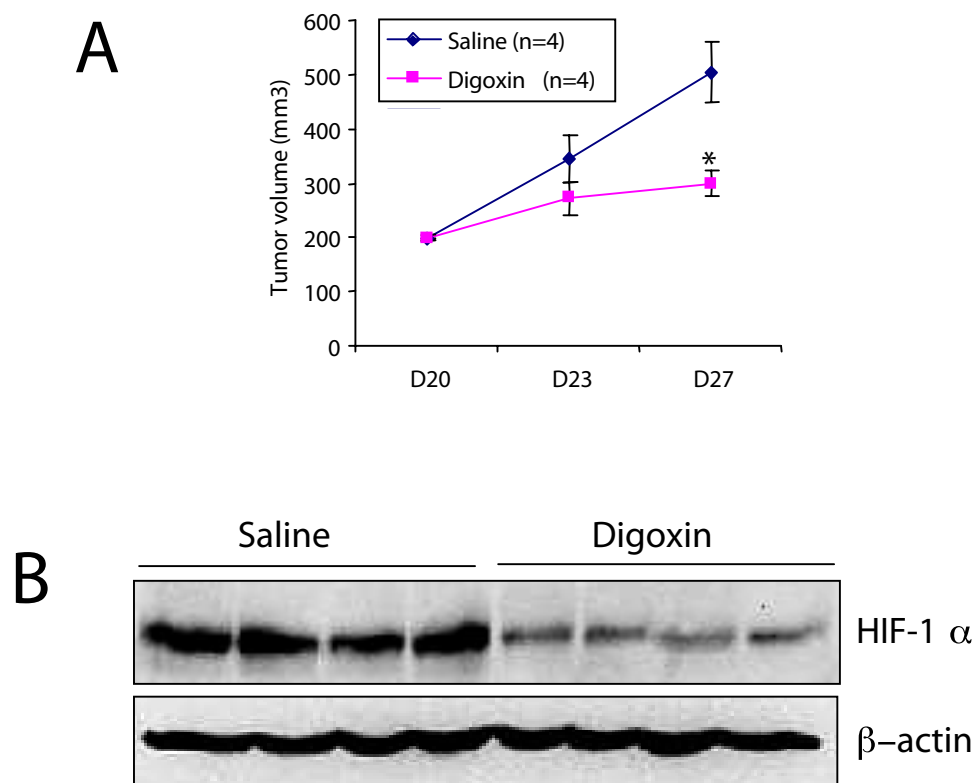

**Fig. S8.** Delayed treatment of PC3 tumor-bearing mice. Mice were treated from day 20 to day 27 after s.c. implantation of PC3 cells with daily i.p. injections of digoxin (2 mg/kg) or saline ( $n = 4$  mice each). Tumor volumes were measured on days 20, 23, and 27 (**A**). The tumors were harvested on day 27, and aliquots of tissue lysates were subjected to immunoblot assays (**B**).

**Table S1. Primers for quantitative real-time RT-PCR assays**

| Name                   | Nucleotide sequence     |
|------------------------|-------------------------|
| Hs-HK1-FWD             | TGGAGTCCGAGGTTTATG      |
| Hs-HK1-REV             | TTTGGATTGTTGGCAAGG      |
| Hs-HK2-FWD             | CCAGTTCATTACATCATCAG    |
| Hs-HK2-REV             | CTTACACGAGGTCACATAGC    |
| Hs-Glut1-FWD           | CGGGCCAAGAGTGTGCTAAA    |
| Hs-Glut1-REV           | TGACGATACCGGAGCCAATG    |
| Hs-HIF-1 $\alpha$ -FWD | CCACAGGACAGTACAGGATG    |
| Hs-HIF-1 $\alpha$ -REV | TCAAGTCGTGCTGAATAATACC  |
| Hs-VEGF-FWD            | CTTGCCTTGCTGCTCTAC      |
| Hs-VEGF-REV            | TGGCTTGAAGATGTACTCG     |
| Hs-TOPO I-FWD          | AATGCGAACTTAGGCTGTTACAC |
| Hs-TOPO I-REV          | CTTCTTCTTCACAACATCAAC   |
| Hs-TOPO II-FWD         | ATGAACAAGTAAACCACAGG    |
| Hs-TOPO II-REV         | GAAACGGCTGAGGCTGCTAC    |
| Hs-ATP1A1-FWD          | CTCTGTGCTTTTCTCTCTG     |
| Hs-ATP1A1-REV          | CTTCTTTCTTCAGTTCATCC    |

**Table S2. Targeting sequences for short hairpin RNAs**

| Name             | GenBank accession no. | Targeting sequence  |
|------------------|-----------------------|---------------------|
| HsTOPO I-sh584   | NM_003286             | CGAAGAAAGAAGAGGAACA |
| HsTOPO II-sh571  | NM_001067             | AAACAGACATGGATGGATA |
| HsTOPO II-sh3479 |                       | GAAAGAGTCCATCAGATTT |
| ATP1A1-sh811     | NM_000701             | GATTCGAAATGGTGAGAAA |
| ATP1A1-sh2293    |                       | GGTCGTCTGATCTTTGATA |
